# Supplementary material for: Stability of temperatures from TIMED/SABER v1.07 (2002–2009) and Aura/MLS v2.2 (2004–2009) compared with OH(6-2) temperatures observed at Davis Station, Antarctica
Source: Copernicus journal article supplement (doi:10.5194/acp-10-11439-2010), 2010-12-03
Supplement: Supplementary file 1 [file acp-10-11439-2010-supplement.pdf]

## Supplemental Material

| Reference Instrument(s)                    | FOV @87km | OH Band /Branch | Transition Probabilities | Years (Coincidences)                         | SABER version Acceptance Range          | Weighting Profile                                            | OH-SABER Bias $\pm\sigma$                                                                         |
|--------------------------------------------|-----------|-----------------|--------------------------|----------------------------------------------|-----------------------------------------|--------------------------------------------------------------|---------------------------------------------------------------------------------------------------|
| <b>Oberheide et al (2006)</b>              |           |                 |                          |                                              |                                         |                                                              |                                                                                                   |
| GRIPS Wuppertal (51.3°N, 7.2°E)            | 29x41km   | OH(3-1) P       | Mies 1974                | 2003-2005<br>(643 nights)                    | v1.06<br>within 600km 30min             | G_87km 8.7km FWHM<br>1.6um VER                               | 7.5 $\pm$ 7.5K<br>6.2K                                                                            |
| <b>Lopez-Gonzalez et al (2007)</b>         |           |                 |                          |                                              |                                         |                                                              |                                                                                                   |
| SATI Sierra Nevada Observatory (37°N, 3°W) | 49x14km   | OH (6-2) P Q    | French et al 2000        | 2002-03,2005-06<br>(79 profiles)             | v1.06<br>$\pm$ 5lat $\pm$ 5long         | 87km Spot sample<br>G_87km 10km FWHM                         | 6.8 $\pm$ 9K<br>5.7 $\pm$ 7K                                                                      |
| <b>Mulligan and Lowe (2008)</b>            |           |                 |                          |                                              |                                         |                                                              |                                                                                                   |
| Bomem FTIR Maynooth (53.2°N, 6.4°W)        | Dia2.8km  | OH(3-1) P       | Mies 1974                | 1993-1994 OH                                 | v1.06                                   | 1.6um VER                                                    | 8.6 $\pm$ 0.8K                                                                                    |
| GRIPS Wuppertal (51.3°N, 7.2°E)            | 29x41km   | OH(3-1) P       | Mies 1974                | (1018 profiles 0405)                         | $\pm$ 2.5lat $\pm$ 5long                | 1.6um VER                                                    | 4.5 $\pm$ 0.5K                                                                                    |
| <b>Smith et al (2009)</b>                  |           |                 |                          |                                              |                                         |                                                              |                                                                                                   |
| Spectrograph Millstone Hill (42.6°N)       | 60x0.3km  | OH(6-2) P       | Goldman et al 1998       | 2005-2007<br>(61 nights)                     | v1.07<br>within 500km                   | 1.6um VER                                                    | 1.7 $\pm$ 9.5K                                                                                    |
| <b>Remsberg et al (2008)</b>               |           |                 |                          |                                              |                                         |                                                              |                                                                                                   |
| SATI Sierra Nevada Observatory (37°N, 3°W) | 49x14km   | OH (6-2) P Q    | French et al 2000        | 2002-03,2005-06<br>(79 profiles)             | v1.07<br>$\pm$ 3lat $\pm$ 5long 1.5hrs  | 2.0 and 1.6um VER                                            | -1.9 $\pm$ 7K                                                                                     |
| MTM Hawaii (20.8°N, 203.8°E)               | Dia180km  | OH(6-2) P       | Goldman et al 1998       | 2003<br>(2300 profiles)                      | v1.07<br>$\pm$ 10lat $\pm$ 20long 12min | VER                                                          | 5.8 $\pm$ 8.9K                                                                                    |
| <b>French &amp; Mulligan (this work)</b>   |           |                 |                          |                                              |                                         |                                                              |                                                                                                   |
| Czerny-Turner Spectrometer Davis           | 8x8km     | OH(6-2)         | Langhoff et al 1986      | 2002-2009<br>(2060 profiles)<br>(847 nights) | v1.07<br>within 500km 8hrs              | T_Alt<br>T_SL<br>T_G87 8km FWHM<br>T_VER<br>T_GFIT<br>T_VERm | -1.2 $\pm$ 11K<br>1.1 $\pm$ 9K<br>0.2 $\pm$ 8K<br>-1.2 $\pm$ 8K<br>-1.3 $\pm$ 8K<br>-0.5 $\pm$ 7K |

Supplemental Table 2. A summary of other studies comparing SABER profiles with OH measurements.

| Miss     | Points |                | T_Alt(K) | T_SL(K) | T_G87 | T_VER | T_GFIT | T_VERm |
|----------|--------|----------------|----------|---------|-------|-------|--------|--------|
| Distance |        |                |          |         |       |       |        |        |
| <500km   | 2060   | Bias           | 0.37     | -2.09   | -1.01 | 0.42  | 0.41   | -0.20  |
| <400km   | 1322   |                | 0.33     | -1.90   | -0.87 | 0.50  | 0.53   | -0.06  |
| <300km   | 731    |                | 0.11     | -2.15   | -1.06 | 0.30  | 0.43   | -0.26  |
| <200km   | 317    |                | -0.13    | -2.17   | -1.06 | 0.08  | 0.15   | -0.37  |
| <100km   | 84     |                | 0.63     | -1.79   | -0.60 | 0.17  | 0.47   | -0.07  |
|          |        |                |          |         |       |       |        |        |
| <500km   | 2060   | Std            | 0.34     | 0.27    | 0.27  | 0.27  | 0.28   | 0.25   |
| <400km   | 1322   | Error          | 0.43     | 0.34    | 0.34  | 0.34  | 0.35   | 0.32   |
| <300km   | 731    |                | 0.59     | 0.45    | 0.46  | 0.45  | 0.47   | 0.42   |
| <200km   | 317    |                | 0.90     | 0.70    | 0.69  | 0.67  | 0.69   | 0.63   |
| <100km   | 84     |                | 1.77     | 1.38    | 1.39  | 1.38  | 1.46   | 1.28   |
|          |        |                |          |         |       |       |        |        |
| <500km   | 2060   | R <sup>2</sup> | 0.18     | 0.20    | 0.29  | 0.31  | 0.34   | 0.32   |
| <400km   | 1322   |                | 0.17     | 0.19    | 0.28  | 0.30  | 0.33   | 0.31   |
| <300km   | 731    |                | 0.17     | 0.20    | 0.29  | 0.30  | 0.33   | 0.32   |
| <200km   | 317    |                | 0.12     | 0.15    | 0.24  | 0.25  | 0.30   | 0.27   |
| <100km   | 84     |                | 0.09     | 0.19    | 0.26  | 0.29  | 0.29   | 0.30   |

Colour scales  SABER – OH Bias  Error & R<sup>2</sup>

Supplemental Table 3. Restrictions on miss distance criteria compared for each weighting function. Values are Bias±Standard Error (R<sup>2</sup>) for each acceptance range.

| Miss     | Points |                | T Alt(K) | T SL(K) | T G87 | T VER | T GFIT | T VERm |
|----------|--------|----------------|----------|---------|-------|-------|--------|--------|
| Time     |        |                |          |         |       |       |        |        |
| <8 hrs   | 1901   | Bias           | 0.51     | -2.03   | -0.92 | 0.52  | 0.52   | -0.15  |
| <6 hrs   | 1893   |                | 0.52     | -2.04   | -0.93 | 0.51  | 0.52   | -0.15  |
| <4 hrs   | 1881   |                | 0.49     | -2.09   | -0.98 | 0.46  | 0.46   | -0.21  |
| <2 hrs   | 1845   |                | 0.51     | -2.09   | -0.97 | 0.46  | 0.48   | -0.20  |
| <1 hr    | 1779   |                | 0.85     | -1.84   | -0.70 | 0.73  | 0.74   | 0.07   |
| < 30 min | 1682   |                | 0.88     | -1.85   | -0.69 | 0.70  | 0.74   | 0.06   |
| <15 min  | 1578   |                | 0.84     | -1.92   | -0.77 | 0.57  | 0.64   | -0.02  |
|          |        |                |          |         |       |       |        |        |
| <8 hrs   | 1901   | Std            | 0.36     | 0.29    | 0.29  | 0.28  | 0.29   | 0.27   |
| <6 hrs   | 1893   | Error          | 0.36     | 0.29    | 0.29  | 0.29  | 0.30   | 0.27   |
| <4 hrs   | 1881   |                | 0.36     | 0.29    | 0.29  | 0.29  | 0.30   | 0.27   |
| <2 hrs   | 1845   |                | 0.37     | 0.30    | 0.30  | 0.30  | 0.31   | 0.28   |
| <1 hr    | 1779   |                | 0.39     | 0.32    | 0.32  | 0.32  | 0.33   | 0.30   |
| < 30 min | 1682   |                | 0.41     | 0.34    | 0.34  | 0.34  | 0.35   | 0.32   |
| <15 min  | 1578   |                | 0.43     | 0.36    | 0.36  | 0.36  | 0.37   | 0.34   |
|          |        |                |          |         |       |       |        |        |
| <8 hrs   | 1901   | R <sup>2</sup> | 0.20     | 0.23    | 0.32  | 0.34  | 0.38   | 0.36   |
| <6 hrs   | 1893   |                | 0.18     | 0.22    | 0.31  | 0.33  | 0.36   | 0.34   |
| <4 hrs   | 1881   |                | 0.19     | 0.22    | 0.31  | 0.33  | 0.36   | 0.36   |
| <2 hrs   | 1845   |                | 0.23     | 0.25    | 0.35  | 0.36  | 0.39   | 0.37   |
| <1 hr    | 1779   |                | 0.26     | 0.27    | 0.38  | 0.39  | 0.42   | 0.39   |
| < 30 min | 1682   |                | 0.23     | 0.25    | 0.34  | 0.35  | 0.39   | 0.36   |
| <15 min  | 1578   |                | 0.20     | 0.24    | 0.32  | 0.33  | 0.36   | 0.34   |

Colour scales  SABER – OH Bias  Error & R<sup>2</sup>

Supplemental Table 4. Restrictions on miss time criteria compared for each weighting function. Values are Bias±Standard Error (R<sup>2</sup>) for each acceptance range.

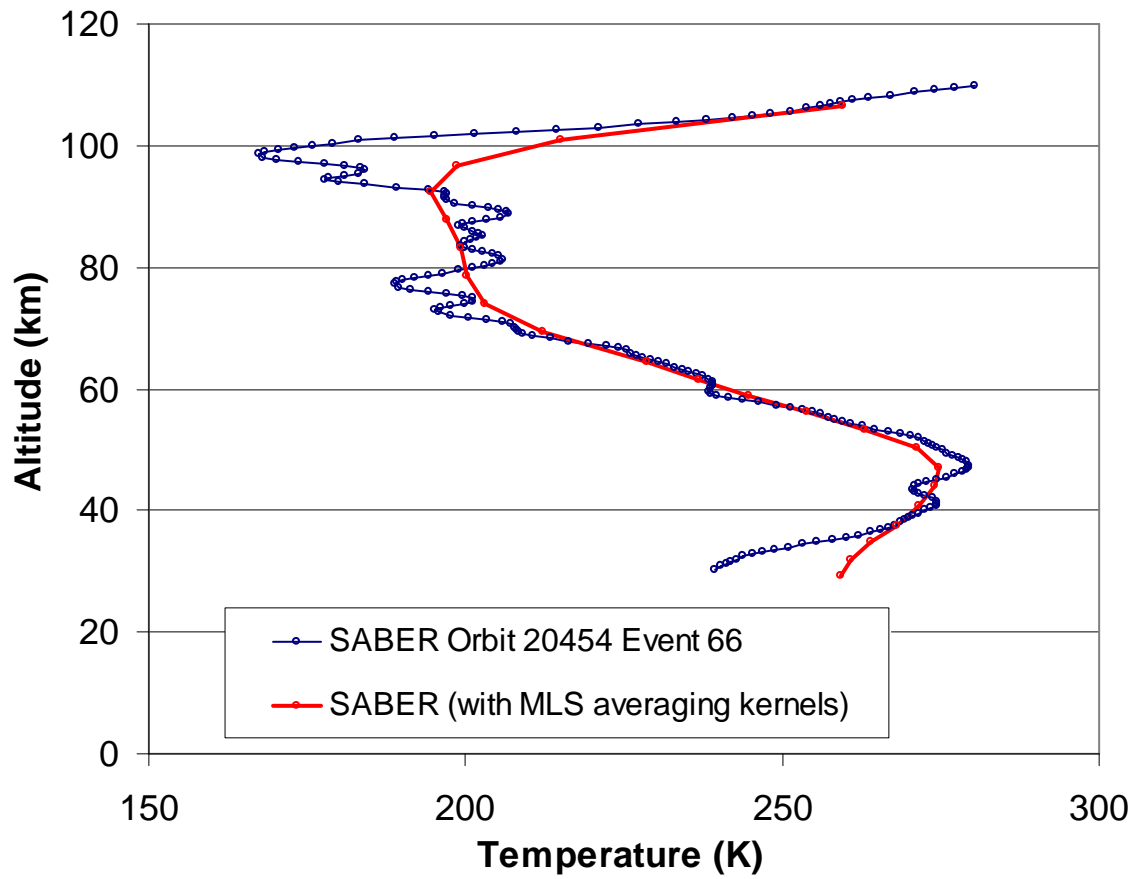

Supplemental Figure 4. An example of a SABER temperature profile and its lower resolution MLS-like equivalent. The latter was obtained by convolving the SABER profile with the Aura-MLS averaging kernels specified in Schwartz et al. (2008).
